# Supplementary material for: Building COPD care on shaky ground: a mixed methods study from Swedish primary care professional perspective
Source: PubMed Central journal article supplement (PMC5504776; doi:10.1186/s12913-017-2393-y), 2017-07-10
Supplement: 12913_2017_2393_MOESM3_ESM.pdf [file 12913_2017_2393_MOESM3_ESM.pdf]

Best,

A number of questions are found below. We ask that you please answer them based on *your own perception/experience* of the subject matter of the question.

Thank you in advance for your participation.

### Background information

Sex/gender: \_\_\_\_\_ Year of birth: \_\_\_\_\_

Current position: \_\_\_\_\_

Number of years in current position: \_\_\_\_\_

Number of years in the profession: \_\_\_\_\_

Supplementary/further training: \_\_\_\_\_

How many patients with COPD do you meet during a regular working week?

|   |     |     |      |       |      |
|---|-----|-----|------|-------|------|
|   |     |     |      |       |      |
| 0 | 1-2 | 3-5 | 6-10 | 11-15 | > 15 |

### 1. Health promotion interventions

a. Offering health promotion interventions to people with COPD is an important task in primary care (please tick the box that best describes your opinion).

|                          |                          |                          |                          |
|--------------------------|--------------------------|--------------------------|--------------------------|
| <input type="checkbox"/> | <input type="checkbox"/> | <input type="checkbox"/> | <input type="checkbox"/> |
| Disagree                 | Agree to<br>some extent  | Largely<br>agree         | Agree<br>completely      |

b. Do you feel like you have sufficient knowledge to offer health promotion interventions to people with COPD?

|                                                                       |                                                                 |
|-----------------------------------------------------------------------|-----------------------------------------------------------------|
| <input type="checkbox"/> Yes, I essentially have sufficient knowledge | <input type="checkbox"/> No, I do not have sufficient knowledge |
|-----------------------------------------------------------------------|-----------------------------------------------------------------|

c. Do your work tasks include providing health promotion interventions to people with COPD?

|                              |                             |
|------------------------------|-----------------------------|
| <input type="checkbox"/> Yes | <input type="checkbox"/> No |
|------------------------------|-----------------------------|

d. *If your work tasks include* providing health promotion interventions to people with COPD, have you encountered any difficulties in providing these interventions/activities?

Yes  No

If yes, please describe \_\_\_\_\_

---

---

## 2. Tobacco prevention

a. Offering tobacco prevention to people with COPD is an important task in primary care (please tick the box that best describes your opinion).

Disagree  Agree to some extent  Largely agree  Agree completely

b. Do you feel like you have sufficient knowledge to offer tobacco prevention to people with COPD?

Yes, I essentially have sufficient knowledge  No, I do not have sufficient knowledge

c. Do your work tasks include providing tobacco prevention to people with COPD?

Yes  No

d. *If your work tasks include* providing tobacco prevention to people with COPD, have you encountered any difficulties in providing these interventions/activities?

Yes  No

If yes, please describe \_\_\_\_\_

---

---

## 3. Disease-specific instruction

a. Offering disease-specific education to people with COPD is an important task in primary care (please tick the box that best describes your opinion).

Disagree  Agree to some extent  Largely agree  Agree completely

b. Do you feel like you have sufficient knowledge to offer disease-specific education to people with COPD?

Yes, I essentially have sufficient knowledge

No, I do not have sufficient knowledge

c. Do your work tasks include providing disease-specific education to people with COPD?

Yes

No

d. *If your work tasks include* providing disease-specific education to people with COPD, have you encountered any difficulties in providing this intervention/activity?

Yes

No

If yes, please describe \_\_\_\_\_

---

---

---

#### 4. Self-care strategies

a. Providing information on strategies for COPD-related self-care (e.g. information on for which symptoms an individual should seek healthcare) to people with COPD is an important task in primary care (please tick the box that best describes your opinion).

Disagree

Agree to  
some extent

Largely  
agree

Agree  
completely

b. Do you feel like you have sufficient knowledge to provide information on strategies for COPD-related self-care to people with COPD?

Yes, I essentially have sufficient knowledge

No, I do not have sufficient knowledge

c. Do your work tasks include providing information on strategies for COPD-related self-care to people with COPD?

Yes

No

d. *If your work tasks include* providing information on strategies for COPD-related self-care to people with COPD, have you encountered any difficulties in providing this intervention/activity?

Yes  No

If yes, please describe \_\_\_\_\_

---

---

### 5. Physical activity/exercise training

a. Offering consultative discussions about physical activity/exercise training to people with COPD is an important task in primary care (please tick the box that best describes your opinion).

Disagree  Agree to some extent  Largely agree  Agree completely

b. Do you feel like you have sufficient knowledge to provide consultative discussions about physical activity/exercise training to people with COPD?

Yes, I essentially have sufficient knowledge  No, I do not have sufficient knowledge

c. Do your work tasks include providing consultative discussions about physical activity/exercise training to people with COPD?

Yes  No

d. *If your work tasks include* providing consultative discussions about physical activity/exercise training to people with COPD, have you encountered any difficulties in providing this intervention/activity?

Yes  No

If yes, please describe \_\_\_\_\_

---

---

## 6. Physical activity on prescription

a. Offering physical activity on prescription to people with COPD is an important task in primary care (please tick the box that best describes your opinion).

|                          |                          |                          |                          |
|--------------------------|--------------------------|--------------------------|--------------------------|
| <input type="checkbox"/> | <input type="checkbox"/> | <input type="checkbox"/> | <input type="checkbox"/> |
| Disagree                 | Agree to<br>some extent  | Largely<br>agree         | Agree<br>completely      |

b. Do you feel like you have sufficient knowledge to offer physical activity on prescription to people with COPD?

|                                                                       |                                                                 |
|-----------------------------------------------------------------------|-----------------------------------------------------------------|
| <input type="checkbox"/> Yes, I essentially have sufficient knowledge | <input type="checkbox"/> No, I do not have sufficient knowledge |
|-----------------------------------------------------------------------|-----------------------------------------------------------------|

c. Do your work tasks include providing physical activity on prescription to people with COPD?

|                              |                             |
|------------------------------|-----------------------------|
| <input type="checkbox"/> Yes | <input type="checkbox"/> No |
|------------------------------|-----------------------------|

d. *If your work tasks include* providing physical activity on prescription to people with COPD, have you encountered any difficulties in providing this intervention/activity?

|                              |                             |
|------------------------------|-----------------------------|
| <input type="checkbox"/> Yes | <input type="checkbox"/> No |
|------------------------------|-----------------------------|

If yes, please describe \_\_\_\_\_  
\_\_\_\_\_  
\_\_\_\_\_

## 7. Breathing techniques

a. Offering instruction and training in breathing techniques to people with COPD is an important task in primary care (please tick the box that best describes your opinion).

|                          |                          |                          |                          |
|--------------------------|--------------------------|--------------------------|--------------------------|
| <input type="checkbox"/> | <input type="checkbox"/> | <input type="checkbox"/> | <input type="checkbox"/> |
| Disagree                 | Agree to<br>some extent  | Largely<br>agree         | Agree<br>completely      |

b. Do you feel like you have sufficient knowledge to provide instruction and training in breathing techniques to people with COPD?

|                                                                       |                                                                 |
|-----------------------------------------------------------------------|-----------------------------------------------------------------|
| <input type="checkbox"/> Yes, I essentially have sufficient knowledge | <input type="checkbox"/> No, I do not have sufficient knowledge |
|-----------------------------------------------------------------------|-----------------------------------------------------------------|

c. Do your work tasks include providing instruction and training in breathing techniques to people with COPD?

|                              |                             |
|------------------------------|-----------------------------|
| <input type="checkbox"/> Yes | <input type="checkbox"/> No |
|------------------------------|-----------------------------|

d. *If your work tasks include* providing instruction and training in breathing techniques to people with COPD, have you encountered any difficulties in providing this intervention/activity?

Yes  No

If yes, please describe \_\_\_\_\_  
\_\_\_\_\_  
\_\_\_\_\_

**8. Nutrition and energy needs**

a. Offering consultative discussions about nutrition and energy needs to people with COPD is an important task in primary care (please tick the box that best describes your opinion).

|                          |                          |                          |                          |
|--------------------------|--------------------------|--------------------------|--------------------------|
| <input type="checkbox"/> | <input type="checkbox"/> | <input type="checkbox"/> | <input type="checkbox"/> |
| Disagree                 | Agree to<br>some extent  | Largely<br>agree         | Agree<br>completely      |

b. Do you feel like you have sufficient knowledge to provide consultative discussions about nutrition and energy needs to people with COPD?

Yes, I essentially have sufficient knowledge  No, I do not have sufficient knowledge

c. Do your work tasks include providing consultative discussions about nutrition and energy needs to people with COPD?

Yes  No

d. *If your work tasks include* providing consultative discussions about nutrition and energy needs to people with COPD, have you encountered any difficulties in providing this intervention/activity?

Yes  No

If yes, please describe \_\_\_\_\_  
\_\_\_\_\_  
\_\_\_\_\_

### 9. Energy conservation techniques and assistive devices

a. Providing information on energy conservation techniques and assistive devices to people with COPD is an important task in primary care (please tick the box that best describes your opinion).

|                          |                          |                          |                          |
|--------------------------|--------------------------|--------------------------|--------------------------|
| <input type="checkbox"/> | <input type="checkbox"/> | <input type="checkbox"/> | <input type="checkbox"/> |
| Disagree                 | Agree to some extent     | Largely agree            | Agree completely         |

b. Do you feel like you have sufficient knowledge to provide information on energy conservation techniques and assistive devices to people with COPD?

|                                                                       |                                                                 |
|-----------------------------------------------------------------------|-----------------------------------------------------------------|
| <input type="checkbox"/> Yes, I essentially have sufficient knowledge | <input type="checkbox"/> No, I do not have sufficient knowledge |
|-----------------------------------------------------------------------|-----------------------------------------------------------------|

c. Do your work tasks include providing information on energy conservation techniques and assistive devices to people with COPD?

|                              |                             |
|------------------------------|-----------------------------|
| <input type="checkbox"/> Yes | <input type="checkbox"/> No |
|------------------------------|-----------------------------|

d. *If your work tasks include* providing information on energy conservation techniques and assistive devices to people with COPD, have you encountered any difficulties in providing this intervention/activity?

|                              |                             |
|------------------------------|-----------------------------|
| <input type="checkbox"/> Yes | <input type="checkbox"/> No |
|------------------------------|-----------------------------|

If yes, please describe \_\_\_\_\_

---

---

### 10. Other interventions/activities

a. Are there any interventions/activities not mentioned in this survey that you would like to offer people with COPD?

|                              |                             |
|------------------------------|-----------------------------|
| <input type="checkbox"/> Yes | <input type="checkbox"/> No |
|------------------------------|-----------------------------|

If yes, please describe \_\_\_\_\_

---

---

b. If you entered any interventions/activities at question 10a, have you experienced any difficulties in providing these interventions/activities to people with COPD?

|                              |                             |
|------------------------------|-----------------------------|
| <input type="checkbox"/> Yes | <input type="checkbox"/> No |
|------------------------------|-----------------------------|

Lundell, 2017. Additional file 3.

If yes, please describe \_\_\_\_\_

\_\_\_\_\_

\_\_\_\_\_
